# Supplementary material for: The ESCRT protein CHMP5 restricts bone formation by controlling endolysosome-mitochondrion-mediated cell senescence
Source: eLife journal article supplement (doi:10.7554/elife.101984), 2024-11-19

CRISPR-vector gRNA

OXPPOS

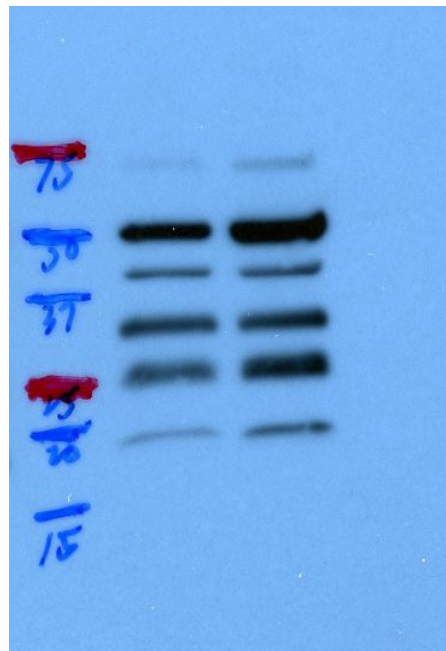

CV-ATP5A, 55kD  
CIII-UQCRC2, 48kD  
CIV-MTCO1, 40kD  
CII-SDHB, 30kD  
CI-NDUF88, 20kD

CRISPR-vector gRNA

$\beta$ -Actin

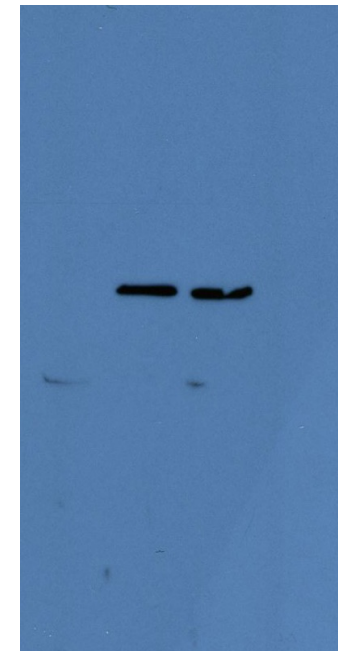

Supplement: fig7-data3 [file elife-101984-fig7-data3-v1.zip]
