# Supplementary material for: The ESCRT protein CHMP5 restricts bone formation by controlling endolysosome-mitochondrion-mediated cell senescence
Source: eLife. 2025 Jul 7;13:RP101984. doi: 10.7554/eLife.101984 (PMC12234009; doi:10.7554/eLife.101984)
Supplement: Figure 1—figure supplement 1—source data 1. [file elife-101984-fig1-figsupp1-data1.xlsx]

## Sheet: Figure 1-figure supplement 1D
Figure 1-figure supplement 1D Whole femur thickness (mm)
Chmp5fl/fl	Dmp1Cre;Chmp5fl/fl
1.4	1.75
1.35	1.9
1.35	1.8
1.3	1.8
1.2	1.8
1.25	2
1.35	2
1.3
