# Supplementary material for: The ESCRT protein CHMP5 restricts bone formation by controlling endolysosome-mitochondrion-mediated cell senescence
Source: eLife. 2025 Jul 7;13:RP101984. doi: 10.7554/eLife.101984 (PMC12234009; doi:10.7554/eLife.101984)
Supplement: Figure 1—source data 1. — For Figure 1D, Data of femur bone stiffness and ultimate stress (fracture stress) by three-point test in CtskCre;Chmp5fl/fl and Chmp5fl/fl mice; Figure 1G, Data of cortical bone thickness (mm) by micro-CT analysis in Dmp1Cre;Chmp5fl/fl relative to Chmp5fl/fl mice; Figure 1H, Data of skeletal muscle mass (mg) in Dmp1Cre;Chmp5fl/fl compared to Chmp5fl/fl mice at 10–12 wk of age; Figure 1J, Data of four-limb handing time (s) and forelimb pull strength (g) in Dmp1Cre;Chmp5fl/fl compared to Chmp5fl/fl mice. [file elife-101984-fig1-data1.xlsx]

## Sheet: Figure 1D-source data
Figure 1D Bone stiffness and ultimate stress
Stiffness (N/mm)			Ultimate Stress (MPa)
Chmp5fl/fl	CtskCre;Chmp5fl/fl		Chmp5fl/fl	CtskCre;Chmp5fl/fl
120.152	6.76435		93.1514	12.5008
80.2678	36.3382		72.4996	15.218
39.6807	21.1765		74.4648	11.6047
64.5431	36.8977		59.1156	9.18279
80.7962	18.7283		54.8088	7.98091

## Sheet: Figure 1G-source data
Figure 1G Cortical bone thickness (mm)
Chmp5fl/fl	Dmp1Cre;Chmp5fl/fl
0.15	0.186
0.149	0.202
0.146	0.217
0.148	0.255
0.143	0.183
0.143

## Sheet: Figure 1H-source data
Figure 1H Skeletal muscle mass (mg)
	Quadriceps				Gastrocnemius
Chmp5fl/fl	260	230	280	300	170	170	160	180
Dmp1Cre;Chmp5fl/fl	120	80	180	100	110	60	130	80

## Sheet: Figure 1J-source data
Figure 1J Four-limb handing time and forelimb pull strength
Four-limb hanging time (sec)			Limb pull strength (g)
Chmp5fl/fl	Dmp1Cre;Chmp5fl/fl		Chmp5fl/fl	Dmp1Cre;Chmp5fl/fl
140	3		85	50
40	3		85	50
100	4		80	60
90	6		100	30
42	6		75	50
60	3		125	50
90	3
120	4
40	2
32	0
