# Supplementary material for: The ESCRT protein CHMP5 restricts bone formation by controlling endolysosome-mitochondrion-mediated cell senescence
Source: eLife. 2025 Jul 7;13:RP101984. doi: 10.7554/eLife.101984 (PMC12234009; doi:10.7554/eLife.101984)
Supplement: Figure 2—figure supplement 1—source data 1. [file elife-101984-fig2-figsupp1-data1.xlsx]

## Sheet: Figure 2-figure supplement 1B
Figure 2-figure supplement 1B Quantification of CD45-;CD31-;GFP+ and CD45-;CD31-;GFP- cell population (%)
GFP-	GFP+
47.2	24.4
61.6	28.2
35.6	27.1
53	30.5
62.4	25.5
45.9	35
46.3	31.7
31.5	20.5
38.7	25.1
43.2	33.1
