# Supplementary material for: The ESCRT protein CHMP5 restricts bone formation by controlling endolysosome-mitochondrion-mediated cell senescence
Source: eLife. 2025 Jul 7;13:RP101984. doi: 10.7554/eLife.101984 (PMC12234009; doi:10.7554/eLife.101984)
Supplement: Figure 2—source data 1. — For Figure 2B, Relative gene expression of Chmp5 in CtskCre;Chmp5fl/fl versus CtskCre;Chmp5fl/+ periskeletal progenitors (2-ΔCt); Figure 2C Data of alkaline phosphatase activity in CtskCre;Chmp5fl/fl compared to CtskCre;Chmp5fl/+ periskeletal progenitors. [file elife-101984-fig2-data1.xlsx]

## Sheet: Figure 2B-source data
Figure 2B Relative gene expression of Chmp5 (2^-△Ct)
CtskCre;Chmp5fl/+	CtskCre;Chmp5fl/fl
0.145146	0.0143085
0.111038	0.0291559
0.127448	0.029932
0.154051	0.0690737
0.142523	0.0630045
0.126587	0.0252338

## Sheet: Figure 2C-source data
Figure 2C Alkaline phosphatase activity assay (relative to Alarma blue)
CtskCre;Chmp5fl/+	CtskCre;Chmp5fl/fl
3.54804	6.73912
3.52533	7.08638
2.90239	6.87819
