# Supplementary material for: The ESCRT protein CHMP5 restricts bone formation by controlling endolysosome-mitochondrion-mediated cell senescence
Source: eLife. 2025 Jul 7;13:RP101984. doi: 10.7554/eLife.101984 (PMC12234009; doi:10.7554/eLife.101984)
Supplement: Figure 3—figure supplement 1—source data 1. — For Figure 3—figure supplement 1A Data of Annexin V stain; Figure 3—figure supplement 1B Data of quantification of TUNEL+ cells (%); Figure 3—figure supplement 1D Gene expression of Cdkn1a and Cdkn2a (FPKM); Figure 3—figure supplement 1F Data of cell number counting in ATDC5 cells after deleting Chmp5 by lentiviral CRISPR/CAS9; Figure 3—figure supplement 1G Data of Annexin V-PI stain in ATDC5 cells with or without Chmp5 deletion; Figure 3—figure supplement 1H Data of cell number counting after treatment with Q-VD-OPh. [file elife-101984-fig3-figsupp1-data1.xlsx]

## Sheet: Figure 3-figure supplement 1A
Figure 3-figure supplement 1A Annexin V stain (%)
CtskCre;Chmp5fl/+	CtskCre;Chmp5fl/fl
2.48	4.08
1.29	5.69
1.31	5.1

## Sheet: Figure 3-figure supplement 1B
Figure 3-figure supplement 1B Quantification of TUNEL+ cells (%)
CtskCre;Chmp5fl/+	CtskCre;Chmp5fl/fl
1	4.5
1.3	3.1
0.3	3.5

## Sheet: Figure 3-figure supplement 1D
Figure 3-figure supplement 1D Cdkn1a and Cdkn2a mRNA levels
FPKM (Cdkn1a)			FPKM (Cdkn2a)
CtskCre;Chmp5fl/+	CtskCre;Chmp5fl/fl		CtskCre;Chmp5fl/+	CtskCre;Chmp5fl/fl
310.458	169.479		234.699	64.7893
241.276	266.891		160.318	151.414
230.358	288.699		89.6552	185.293

## Sheet: Figure 3-figure supplement 1F
Figure 3-figure supplement 1F Cell number counting (x 10^5)
Days	CRISPR-Vector			CRISPR-Chmp5
0	0.5275	0.557	0.469	0.645	0.528	0.528
1	1.435	1.11	1.41	1.11	1.23	0.645
2	2.76	3.05	3.23	1.06	0.911	1.47
3	7.27	6.1	6.57	2.17	1.99	1.525

## Sheet: Figure 3-figure supplement 1G
Figure 3-figure supplement 1G Data of Annexin V-PI stain
Annexin V+/PI- cells (%)		Annexin V+/PI+ cells (%)
CRISPR-Vector	CRISPR-Chmp5	CRISPR-Vector	CRISPR-Chmp5
0.98	2.94	1.09	4.2
1.13	2.33	1.93	2.99
1.15	2.52	1.83	4.05

## Sheet: Figure 3-figure supplement 1H
Figure 3-figure supplement 1H Cell number counting (x 10^5)
Q-VD-Oph (μM)	CRISPR-Vector			CRISPR-Chmp5
0	4.46	3.69	3.75	2.17	2.64	2.64
100	4.28	3.34	3.23	2.82	2.82	2.93	3.4	2.76
