# Supplementary material for: The ESCRT protein CHMP5 restricts bone formation by controlling endolysosome-mitochondrion-mediated cell senescence
Source: eLife. 2025 Jul 7;13:RP101984. doi: 10.7554/eLife.101984 (PMC12234009; doi:10.7554/eLife.101984)
Supplement: Figure 3—source data 1. — For Figure 3A, Data of cell number counting and AlamarBlue assay in CtskCre;Chmp5fl/fl and CtskCre;Chmp5fl/+ periskeletal progenitors from 2-wk-old animals; Figure 3E, Data of quantification of γH2AX+;GFP+ cells in the periosteum and periskeletal overgrowth in CtskCre;Chmp5fl/+;Rosa26mTmG/+ and CtskCre;Chmp5fl/fl;Rosa26mTmG/+ mice; Figure 3G, Data of cell cycle analysis in ATDC5 cells with or without Chmp5 deletion. [file elife-101984-fig3-data1.xlsx]

## Sheet: Figure 3A-source data
Cell number counting (x10^5)
days	CtskCre;Chmp5fl/+			CtskCre;Chmp5fl/fl
0	0.7	0.79	1.115	0.7	0.938	1.17
6	3.917	4.783	5.467	1.467	3.017	1.467
AlamarBlue assay
days	CtskCre;Chmp5fl/+									CtskCre;Chmp5fl/fl
1	33984	35957	35249	36032	36239	34832	34188	35517	35349	37109	37453	37062	37840	38960	37297	37996	38454	38502
3	69891	75424	72847	71614	75896	72927	71640	76542	73769	49723	56308	54633	51233	54685	52961	51532	55643	54339
5	112178	113053	120128	115212	112479	118151	113970	114260	120682	76923	82142	84503	78348	81740	83382	77669	81624	81530

## Sheet: Figure 3E-source data
Figure 3E Quantification of γH2AX+;GFP+ cells in the periosteum and periskeletal overgrowth (%)
CtskCre;Chmp5fl/+	CtskCre;Chmp5fl/fl
0	9.73
0	14.63
0	18.48

## Sheet: Figure 3G-source data
Figure 3G Cell cycle analysis (%)
	CRISPR-Vector						CRISPR-Chmp5
G0/G1	42.1	41.3	42.4	41.6	40.4	41.5	50.9	50.7	51.6	50.9	50.4	50.4
S	51.3	50.6	49.8	51.1	51.6	50.6	36.5	35.6	34.3	35.2	35.2	36.5
G2/M	4.1	3.57	3.41	4.13	3.7	3.42	4.97	5.78	4.96	4.88	5.17	5.47
Apopt	0.41	0.9	1.03	0.58	0.87	1.05	5.05	5.04	5.35	5.49	5.49	4.76
