# Supplementary material for: The ESCRT protein CHMP5 restricts bone formation by controlling endolysosome-mitochondrion-mediated cell senescence
Source: eLife. 2025 Jul 7;13:RP101984. doi: 10.7554/eLife.101984 (PMC12234009; doi:10.7554/eLife.101984)
Supplement: Figure 4—figure supplement 1—source data 1. — For Figure 4—figure supplement 1A, Data of extracellular vesicle size distribution in CtskCre;Chmp5fl/fl and wild-type skeletal progenitors; Figure 4—figure supplement 1B, Data of quantifying Alizarin red S staining; Figure 4—figure supplement 1C, Data of AlamarBlue activity assay in CD45-;CD31-;GFP- progenitors; Figure 4—figure supplement 1E, Data of quantifying cell proliferation marker Ki-67+ cells. [file elife-101984-fig4-figsupp1-data1.xlsx]

## Sheet: Figure 4-figure supplement 1A
Figure 4-figure supplement 1A Size distribution of extracellular vesicles (nm)
	Wild-type															CtskCre;Chmp5fl/fl
D10	139.6	141.9	147.6	151.4	136.1	133.5	150.4	133.3	155.5	144	149.1	149.8	144.7	147.6	152.7	143.2	120.8	144.9	150	152.1	152.9	143.1	155.6	143.2	146.9	143.9	147.4	145.3	146.6	153.1
D20	199.5	196.4	180.5	172.9	181.7	192.3	195.5	193.7	204.1	187.4	190.8	186.3	195.8	183.5	191.4	174.9	195.6	187.8	182	190	195.4	198	186.4	162.7	183.9	187.1	202.1	191.8	188.4	184.8
D90	295	252.6	228.4	253.1	252	278.4	250	242.8	229.9	253.2	241.9	245	294.6	273.8	256.1	225.1	243.5	253.7	232.4	260.7	288.3	244.8	239.8	268.7	244.1	288.3	292.3	271.5	246	261

## Sheet: Figure 4-figure supplement 1B
Figure 4-figure supplement 1B Quantification of alizarin red staining (absorbance 405 nm)
Wild-type	CtskCre;Chmp5fl/fl
0.338	0.8085
0.3305	0.731
0.3215	0.7045

## Sheet: Figure 4-figure supplement 1C
Figure 4-figure supplement 1C AlarmaBlue assay of CD45-;CD31-;GFP- progenitor cells
Wild-type	CtskCre;Chmp5fl/fl
134509	187271
150219	186702
148616	192629
138378	189359
147320	187501
151393	195128
141780	189606
151576	188313
150337	191367
136295	187898
144502	186232
146115	192008

## Sheet: Figure 4-figure supplement 1E
Figure 4-figure supplement 1E Qantification of Ki-67+ cells (%)
CtskCre;Chmp5fl/+	CtskCre;Chmp5fl/fl
3.4	14.91
1.35	25.81
1.21	16.12
