# Supplementary material for: The ESCRT protein CHMP5 restricts bone formation by controlling endolysosome-mitochondrion-mediated cell senescence
Source: eLife. 2025 Jul 7;13:RP101984. doi: 10.7554/eLife.101984 (PMC12234009; doi:10.7554/eLife.101984)
Supplement: Figure 4—source data 1. — For Figure 4B, Data of quantifying extracellular vesicle number (per cell); Figure 4D, Data of extracellular vesicle concentration (× 105 particles/ml); Figure 4E, Cell number counting determining cell proliferation in ATDC5 cells treated with culture supernatant from Chmp5-deficient or Chmp5-sufficient cells; Figure 4F, Cell number counting examining cell proliferation in CD45-;CD31-;GFP- progenitors. [file elife-101984-fig4-data1.xlsx]

## Sheet: Figure 4B-source data
Figure 4B Quantifying extracellular vesicle number (per cell)
Wild-type	CtskCre;Chmp5fl/fl
0	12
1	20
0	10
0	25
2	0
1	0
0	1
0	1
0	2
1	2
0	0
0	10
1	5
0	8
0	23
0	5
0	0
2	2
1	7
0	13
5	6
1	10
0	13
0	17
2	21
1	2
3	20
1	13
5	4
0	9

## Sheet: Figure 4D-source data
Figure 4D Extracellular vesicle concentration (x 10^8 particles/ml)
Wild-type	CtskCre;Chmp5fl/fl
2.24	2.84
2.22	4.51
2.43	3.32
2.35	3.13
2.79	2.59
2.48	4.39
2.67	4.49
2.05	4.24
2.72	3.86
2.13	4.67
3.31	3.48
2.58	4.19
2.56	3.25
2	3.52
3.18	3.57

## Sheet: Figure 4E-source data
Figure 4E Cell number counting (x 10^5)
	CRISPR-Vector			CRISPR-Chmp5
0	0.403	0.645	0.513	0.47	0.491	0.528
1	1.13	1.028	1.121	1.305	1.378	1.423
2	2.463	2.17	2.155	2.775	3.325	2.825
3	3.888	5.05	4.825	6.575	6.625	5.7

## Sheet: Figure 4F-source data
Figure 4F Cell number counting (x 10^5)
	Wild-type			CtskCre;Chmp5fl/fl
0	0.398	0.48	0.434	0.388	0.452	0.48
1	0.492	0.402	0.446	0.728	0.844	0.75
2	0.822	0.574	0.786	1.22	1.138	1.162
3	0.95	1.09	0.962	1.654	1.536	1.425
