# Supplementary material for: The ESCRT protein CHMP5 restricts bone formation by controlling endolysosome-mitochondrion-mediated cell senescence
Source: eLife. 2025 Jul 7;13:RP101984. doi: 10.7554/eLife.101984 (PMC12234009; doi:10.7554/eLife.101984)
Supplement: Figure 5—source data 1. — For Figure 5A, Data of Incucyte live-cell apoptosis analysis in CtskCre;Chmp5fl/fl and wild-type periskeletal progenitors after quercetin and dasatinib (Q+D) treatment; Figure 5C, Data of four-limb hanging time (s) and forelimb pull strength (g) in Dmp1Cre;Chmp5fl/fl and Chmp5fl/fl mice after Q+D treatment; Figure 5E, Data of cortical bone thickness (mm) by micro-CT analysis after Q+D treatment. [file elife-101984-fig5-data1.xlsx]

## Sheet: Figure 5A-source data
Figure 5A Incucyte live-cell apoptosis analysis (Red area/Phase area)
Hours	Wild-type			CtskCre;Chmp5fl/fl			Wild-type with Q+D			CtskCre;Chmp5fl/fl with Q+D
0	0.0104829	0.0108446	0.00802267	0.0157375	0.0143441	0.0126425	0.00767934	0.00826616	0.00839881	0.0116669	0.0111212	0.012656
3	0.0129862	0.0129525	0.0104666	0.0172311	0.0163084	0.014841	0.00991094	0.0105558	0.010527	0.0141165	0.0130765	0.0147976
6	0.0117905	0.0116771	0.0095158	0.0177934	0.0181615	0.0156428	0.00955229	0.00970878	0.0102246	0.0149133	0.0136807	0.0151434
9	0.0118848	0.0115625	0.00958983	0.0210076	0.0222128	0.0183767	0.00962798	0.0105306	0.0103091	0.0169058	0.0156886	0.0172765
12	0.0116928	0.0115786	0.0101028	0.0257743	0.0262521	0.0224995	0.010093	0.0111789	0.0105947	0.0197359	0.019419	0.0204611
15	0.0122395	0.0119344	0.010783	0.0303502	0.0306032	0.0265424	0.0108862	0.0123764	0.0111101	0.0251404	0.0235968	0.0240437
18	0.0126879	0.011754	0.0116139	0.0336738	0.0343577	0.0300071	0.0120588	0.01393	0.0116957	0.0292799	0.0263582	0.0276832
19.3667	0.015224	0.0142457	0.0143073	0.0401373	0.0408791	0.0363388	0.0125004	0.0116203	0.00980429	0.0359675	0.0281541	0.0313475
22.3667	0.0145248	0.0143141	0.0141029	0.0391934	0.0413995	0.0358305	0.0136926	0.0134415	0.0119605	0.0376865	0.03197	0.0343353
25.3667	0.0161913	0.0160044	0.0146326	0.0415771	0.0430911	0.0390551	0.0153019	0.015589	0.0137073	0.0426779	0.0374922	0.0390359
28.3667	0.0170845	0.0173936	0.0163138	0.0443195	0.0446497	0.041167	0.017585	0.0170394	0.0152182	0.0503843	0.0448199	0.04519
31.3667	0.0179496	0.0189302	0.0181364	0.0479754	0.0464113	0.0454991	0.0222591	0.0191399	0.0168044	0.0573671	0.052584	0.05296
34.3667	0.0198615	0.0211618	0.0205531	0.0523055	0.0486603	0.0473619	0.0246831	0.0219012	0.0241462	0.0683065	0.0597054	0.0615047
37.3667	0.0219882	0.0233695	0.0229365	0.0548623	0.0497986	0.0498369	0.0274461	0.0243506	0.0268549	0.0812806	0.0710982	0.0712965
40.3667	0.0238077	0.0261775	0.0247633	0.0572672	0.0508977	0.0523504	0.0299646	0.0267394	0.0308028	0.10379	0.0840863	0.0819271
43.3667	0.0263927	0.0293014	0.0279209	0.059843	0.0523367	0.0555246	0.0321536	0.0302265	0.0323211	0.124391	0.100973	0.0962866
46.3667	0.0288407	0.0318563	0.030088	0.0631094	0.0551966	0.0578362	0.0367596	0.0322977	0.0349379	0.138318	0.114249	0.106058
49.3667	0.0316885	0.0348737	0.0339885	0.066123	0.0578738	0.0615573	0.0408418	0.0359077	0.0378451	0.143096	0.122202	0.112868
52.3667	0.034605	0.0378545	0.0360647	0.0689737	0.0588436	0.0637507	0.0462291	0.0401599	0.0396982	0.150358	0.132552	0.11991
55.3667	0.0371525	0.040757	0.0380175	0.0729098	0.0610752	0.0650586	0.0527068	0.0441296	0.0422162	0.154633	0.13745	0.125108
58.3667	0.0389727	0.0439064	0.0394939	0.0762212	0.0638423	0.0687469	0.0576867	0.0470372	0.0433353	0.165394	0.141531	0.131275

## Sheet: Figure 5C-source data
Four-limb hanging time (sec)
	PEG400												Q + D
Chmp5fl/fl	40	90	45	30	125	50	90	100	60	40	70	50	60	90	100	45	70	40	30	100	45	40	80	40
Dmp1Cre;Chmp5fl/fl	0	2	3	4	2	3	8	5	6	1	2	0	7	50	7	35	30	15	18	20	10	25	15	10
Forelimb pull strength (g)
	PEG400							Q + D
Chmp5fl/fl	120	115	85	75	85	125	85	125	75	85	115	85	85	100
Dmp1Cre;Chmp5fl/fl	50	50	55	60	30	65	35	100	125	75	50	65	65	75

## Sheet: Figure 5E-source data
Figure 5E Cortical bone thickness (mm)
PEG400	Q+D
0.214	0.158
0.197	0.177
0.217	0.179
0.198	0.159
0.238	0.181
