# Supplementary material for: The ESCRT protein CHMP5 restricts bone formation by controlling endolysosome-mitochondrion-mediated cell senescence
Source: eLife. 2025 Jul 7;13:RP101984. doi: 10.7554/eLife.101984 (PMC12234009; doi:10.7554/eLife.101984)
Supplement: Figure 6—figure supplement 1—source data 1. — For Figure 6—figure supplement 1A, Data of quantifying LysoTracker Red DND-99 fluorescence intensity; Figure 6—figure supplement 1D, Pearson’s R value (above threshold) of colocalization analysis of LAMP1 and RAB7 by ImageJ Coloc2 programme; Figure 6—figure supplement 1F, Vps4a mRNA expression in CtskCre;Chmp5fl/fl vs. CtskCre;Chmp5fl/+ periskeletal progenitors (FPKM by RNA-seq); Figure 6—figure supplement 1H, Relative gene expression of CHMP5 and VPS4A (2-ΔΔCt). [file elife-101984-fig6-figsupp1-data1.xlsx]

## Sheet: Figure 6-figure supplement 1A
Figure 6-figure supplement 1A Quantification of LysoTracker Red DND-99 fluorescence intensity
Wild-type	CtskCre;Chmp5fl/fl
1.60728	1.75439
1.78868	1.70653
1.31918	1.63558
1.47854	1.91314
1.31989	2.00609
1.28029	1.75122
1.697	1.90769
1.41915	1.96973
0.706626	1.84596
0.788899	1.59723
1.32985	1.60168

## Sheet: Figure 6-figure supplement 1D
Figure 6-figure supplement 1D Colocalization analysis of LAMP1 and RAB7 by ImageJ Coloc2 programme: Pearson’s R value (above threshold)
CRISPR-Vector	CRISPR-Chmp5
0.15	0.25
0.29	0.29
0.21	0.32
0.13	0.28
0.12	0.45
0.16	0.32
0.37	0.32
0.17	0.32
0.4	0.17
0.12	0.35
0.35	0.35
0.47	0.4
0.14	0.46
0.29	0.41
0.24	0.4
0.35	0.37
0.3	0.26
0.22	0.33
0.42	0.2
0.34	0.31

## Sheet: Figure 6-figure supplement 1F
Figure 6-figure supplement 1F RNA-seq data showing Vps4a mRNA expression (FPKM)
CtskCre;Chmp5fl/+	CtskCre;Chmp5fl/fl
24.4086	22.2047
22.3352	20.5803
22.2358	23.3556

## Sheet: Figure 6-figure supplement 1H
Relative gene expression (CHMP5)			Relative gene expression (VPS4A)
Vector	CHMP5-flag		Vector	CHMP5-flag
1.13734	57.2772		1.05746	0.967747
0.902643	74.2529		0.969913	1.17092
0.974075	70.4485		0.975001	1.15645
