# Supplementary material for: The ESCRT protein CHMP5 restricts bone formation by controlling endolysosome-mitochondrion-mediated cell senescence
Source: eLife. 2025 Jul 7;13:RP101984. doi: 10.7554/eLife.101984 (PMC12234009; doi:10.7554/eLife.101984)
Supplement: Figure 6—source data 1. — For Figure 6D, Data of LAMP1+ vesicle number and average size; Figure 6F, Data of RAB7+ vesicle number and average size. [file elife-101984-fig6-data1.xlsx]

## Sheet: Figure 6A-source data
Figure 6A Cell count
	Abnormal	Normal
Wild type	8.5	191.5
CtskCre;Chmp5fl/fl	90.25	109.75

## Sheet: Figure 6D-source data
Lysosomal vesicle # per cell			Average vesicle size (pixels)
CRISPR-Vector	CRISPR-Chmp5		CRISPR-Vector	CRISPR-Chmp5
24	43		33.5	59.395
27	24		27.037	37.833
35	19		28.229	42.737
13	20		14.538	25.25
16	38		33.562	32.342
31	40		26.419	25.05
20	55		30.85	27.091
23	23		20.391	33.783
14	23		31	34.783
35	22		32.457	60.955
27	29		36.148	35.517
57	18		17.649	18.611
30	59		24.633	65.102
57	14		29.439	58.286
72	72		23.542	38.333
65	28		34.446	30.857
31	63		16.355	20.524
31	26		27.161	31.692
20	79		26.6	29.772
11	56		20.364	25.625
39	29		14.872	41.931
28	33		41.929	21.758
19	29		31.105	32.552
16	36		36.812	24.028
9	19		42.111	33.211
9	174		52	46.5
33	163		20.97	38.497
9	100		13	29.49
18	45		34.667	30.756
29	41		21.724	68.951
16	21		28.062	38.667
36	13		22.806	73.846
21	37		35.095	36.135
24	18		26.375	40.056
32	22		23.875	51.909
22	40		29.773	57.675
17	34		23.176	20.353
11	48		60.727	53.354
22	58		32	37.328
25	35		34.16	35.514
16	33		29.188	23.909
19	83		26.632	24.458
18	30		37.944	27.8
14	35		40.786	37.514
16	51		30.125	41.275
16	65		31.938	43.015
24	31		35.25	32.032
32	53		24.562	31.585
35	34		20.171	48.353
32	29		33.969	24.31
26	17		23.538	57.765
19	34		26.684	51.647
43	37		16.163	34.189
32	33		42.406	49.697
16	22		57.625	40.864
19	26		61.053	22.538
33	49		35.242	95.388
62	89		29.403	38.079
71	114		29.197	33.5
47	145		36.511	40.048
19	54		22.105	30.648
21	27		22.333	37.407
19	45		22.105	40.756
30	33		33.233	18.182
11	88		32.364	30.932
8	83		48.875	31
31			27.71
25			25.52
20			18.35
10			38.4
19			22.421
17			25.235
41			22.854
17			36.235
12			33.167
14			32.143
12			29.5
26			38.538
18			27.222
9			34.556
14			53.786
20			34.1
33			20.485
31			29.323
31			19.581
35			23.4
18			41.111
29			19.414
13			30
15			34.133
15			11.6
21			29.143
17			34.059

## Sheet: Figure 6F-source data
RAB7+ vesicle # per cell			Average vesicle size (pixels)
CRISPR-Vector	CRISPR-Chmp5		CRISPR-Vector	CRISPR-Chmp5
87	38		34.586	75
126	76		34.349	46.474
56	102		30.125	52.941
134	89		24.433	26.584
84	110		32.667	28.327
73	74		44.753	25.649
63	93		30.746	52.978
88	192		17.977	42.156
58	102		35.655	46.608
75	124		35.227	30.54
87	152		39.333	41.632
94	71		25.181	57.085
93	210		36.839	36.257
130	103		21.323	44.699
69	119		35.275	37.798
144	35		30.597	56.143
64	85		36.359	62.059
49	183		17.755	35.169
60	81		39.4	49.358
125	86		23.392	30.779
67	114		38.343	40.605
58	69		19.172	40.507
142	106		29.486	25.123
79	104		34.443	29.337
107	62		30.355	80.806
153	120		28.542	52.992
192	256		29.318	32.047
83	95		27.012	30.474
83	127		34.422	32.244
140	235		26.357	26.732
146	197		36.007	35.914
123	387		36.268	37.155
90	218		45.233	26.606
69	69		51.116	74.971
89	110		24.056	42.664
131	97		38.481	27.32
128	105		38.578	37.048
156	171		36.378	42.269
55	188		46.491	40.287
72	159		37.403	32.755
137	142		34.416	35.577
185	167		34.686	33.772
75	254		43.867	47.78
59	104		39.932	39.192
53	128		29.736	49.961
79	107		24.354	36.019
106	165		31.047	40.394
152	79		31.125	59.57
157	115		30.376	47.974
181	98		27.282	31.796
124	190		37.379	31.226
57	135		28.298	51.526
55	142		36.4	39.169
50	210		22.56	24.995
94	107		26.223	32.738
72	88		25.208	39.159
51	205		33.843	38.38
106	85		20.057	51.376
69	64		37.362	47.641
64	85		29.766	56.882
63	230		24.619	41.865
48	121		30.521	45.826
56	221		22.429	36.317
69	168		23.014	44.78
89	102		31.461	49.353
62	82		31.742	42.024
91	349		41.758	31.249
117	203		25.915	36.818
45	197		30.756	37.157
106	144		49.142	50.146
78	99		39.308	60.152
85	188		40.188	41.463
38	324		35.158	37.296
69	151		28.754	41.192
45	217		14.778	36.668
62	187		22.823	31.171
52	119		32.173	32.697
50	125		45.3	28.664
45	109		18.956	43.358
36	87		23.056	31.644
66	104		34.894	34.74
82	58		29.488	41.862
27	55		24.444	36.964
62	97		23.903	62.804
50	142		34.72	49.986
64	96		29.641	31.656
74	185		49.946	44.632
69	132		39.188	47.833
117	101		33.838	66.059
134	87		31.701	42.598
34	79		67.559	28.203
60	34		23.833	59.824
76			41.105
71			29.845
