# Supplementary material for: The ESCRT protein CHMP5 restricts bone formation by controlling endolysosome-mitochondrion-mediated cell senescence
Source: eLife. 2025 Jul 7;13:RP101984. doi: 10.7554/eLife.101984 (PMC12234009; doi:10.7554/eLife.101984)
Supplement: Figure 7—figure supplement 1—source data 1. [file elife-101984-fig7-figsupp1-data1.xlsx]

## Sheet: Figure 7-figure supplement 1D
Relative gene expression (H2afx, 2^-ΔCt)			Relative gene expression (Trp53, 2^-ΔCt)
CtskCre;Chmp5fl/+	CtskCre;Chmp5fl/fl		CtskCre;Chmp5fl/+	CtskCre;Chmp5fl/fl
0.00271194	0.00499262		0.0405124	0.048144
0.00126591	0.00302743		0.0523153	0.0641635
0.0024179	0.00203333		0.0473792	0.0559045
0.00163448	0.00556182		0.0314879	0.0435209
0.00136379	0.00211149		0.0326234	0.0416087
0.00127791	0.00274105		0.036424	0.0563421
				0.0729788
