# Supplementary material for: The ESCRT protein CHMP5 restricts bone formation by controlling endolysosome-mitochondrion-mediated cell senescence
Source: eLife. 2025 Jul 7;13:RP101984. doi: 10.7554/eLife.101984 (PMC12234009; doi:10.7554/eLife.101984)
Supplement: Figure 7—source data 1. — For Figure 7B, Data of quantifying CellROX Deep Red fluorescence intensity; Figure 7C, Data of quantifying TMRE fluorescence intensity; Figure 7E, Data of cell number counting; Figure 7F, Data of mitochondrial respiratory capacity and extracellular acidification rate in CtskCre;Chmp5fl/fl relative to wild-type periskeletal progenitors; Figure 7G, Data of cell number counting and AlamarBlue assay after treatment with N-Acetyl cysteine. [file elife-101984-fig7-data1.xlsx]

## Sheet: Figure 7B-source data
Figure 7B Quantification of CellROX Deep Red fluorescence intensity
Wild-type	CtskCre;Chmp5fl/fl
0.0429097	0.0724884
0.0669057	0.062844
0.0488846	0.0644689
0.0672042	0.0852235
0.0549917	0.0667674
0.0625986	0.0717449
0.0504392	0.0744764
0.0547551	0.07632
0.0634894	0.0736256
0.0623694	0.0807748

## Sheet: Figure 7C-source data
Figure 7C Quantification of TMRE fluorescence intensity
CRISPR-Vector	CRISPR-Chmp5
1.24267	1.57635
1.25605	1.43018
1.40111	1.63253
1.10779	1.54849
1.21216	1.15601
1.12708	1.40984
1.1703	1.42605
1.33586	1.41841
1.37527	1.6737
0.960807	1.76187
1.09063	1.13669
0.691086	0.814491

## Sheet: Figure 7E-source data
Figure 7E Cell number counting (x 10^5)
CRISPR-Control	CRISPR-Chmp5
12.3	0.704
10.3	0.88
12	1.58
13.8	1.23
14.3	0.821
12.1	1.29

## Sheet: Figure 7F-source data
Mitochondrial respiratory capacity (OCR pmol/min)			Extracellular acidification rate (ECAR mpH/min)
Wild-type	CtskCre;Chmp5fl/fl		Wild-type	CtskCre;Chmp5fl/fl
307.995	268.545		18.1916	48.2049
315.143	261.995		18.2755	32.4105
316.428	270.293		21.0093	35.8854
307.229	288.68		16.8452	22.1664
341.746	259.149		17.1555	39.0419
328.975	278.357		19.8469	45.4498
301.036	288.932		18.4677	39.2944
317.7	252.086		16.3626	39.5689
316.9	279.074		17.9455	48.3157
281.749	273.056		22.4517	43.3773
263.979	289.757		22.133	46.2287
286.627	243.391		17.2712	38.0273
289.358	271.519		21.2101	41.8574
352.824	266.994		19.2334	48.1896
334.936	248.784		18.8622	31.6535
257.369	281.686		8.66331	44.976
302.945	268.352		17.6071	52.6334
289.183	277.177		22.7808	30.1384
307.59	261.508		19.0519	35.4193
276.17	243.48		18.951	37.5875
336.847	249.747		19.6169	43.2895
312.302	262.375		19.8804	39.8681
274.601			21.6029
295.172			16.3403

## Sheet: Figure 7G-source data
Cell number counting (x 10^5)
NAC (mM)	CRISPR-Vector			CRISPR-Chmp5
0	6.625	5.81	5.22	3.46	4.165	3.23	3.17	3.58
5	5.34	5.1	4.99	4.69	4.52	5.45	4.87	3.99
AlamarBlue assay (Fluorescence intensity)
	CRISPR-Vector												CRISPR-Chmp5
0	91502	92629	92994	92507	93264	92864	93829	92096	93343	92372	90064	88300	71950	73515	79645	75862	78234	78730	76406	74656	78435	75667	74506	75515
5	86236	88148	86231	90254	87632	86933	89964	89835	88735	88302	88338	87830	81837	84426	84614	83157	85186	86072	82856	84453	83771	84137	81918	84459
