# Supplementary figures and images for: The ESCRT protein CHMP5 restricts bone formation by controlling endolysosome-mitochondrion-mediated cell senescence
Source: eLife journal article supplement (doi:10.7554/elife.101984), 2024-11-19

CRISPR/CAS9 in MC3T3-E1 cells

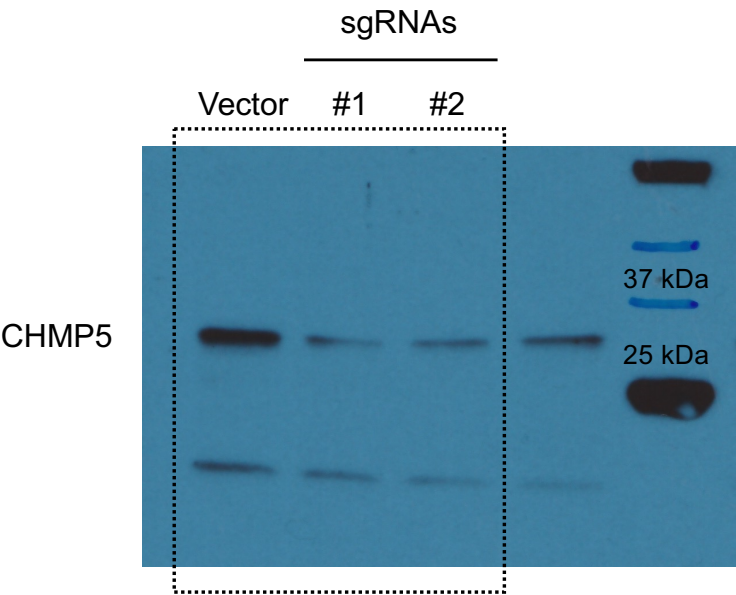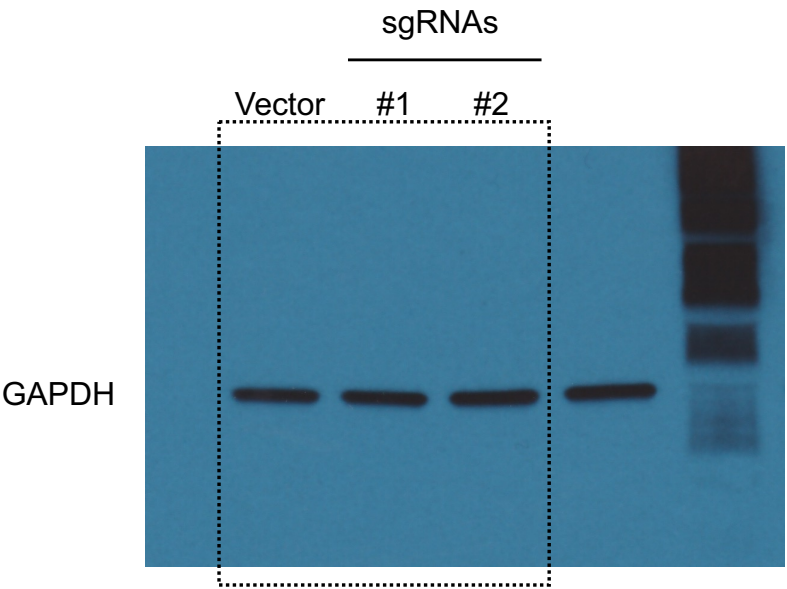

Supplement: fig2-data3 [file elife-101984-fig2-data3-v1.zip]

*Ctsk*<sup>Cre</sup>;  
Control *Chmp5*<sup>fl/fl</sup>

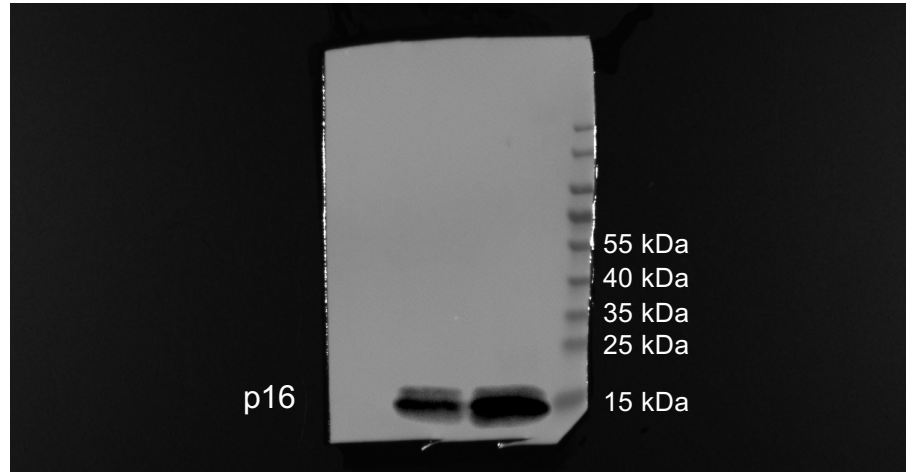

*Ctsk*<sup>Cre</sup>;  
Control *Chmp5*<sup>fl/fl</sup>

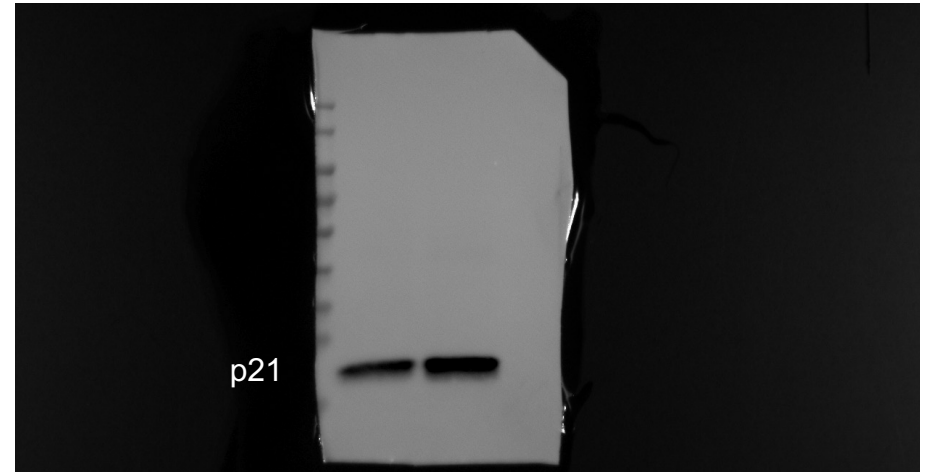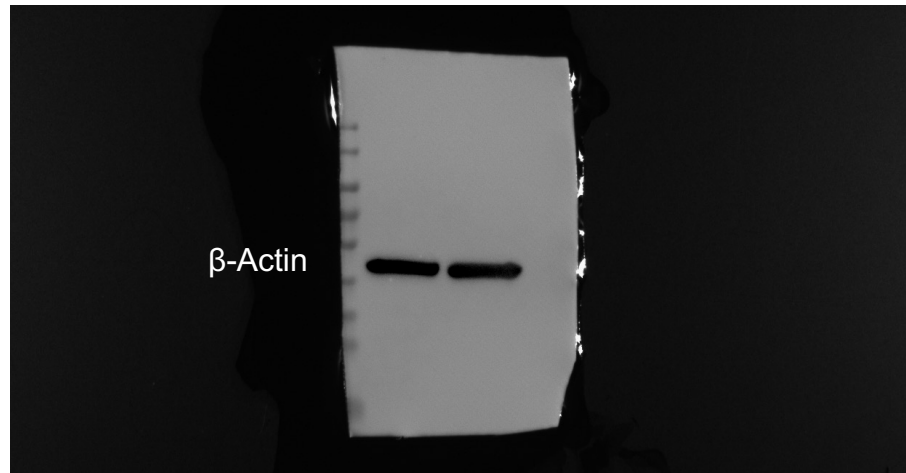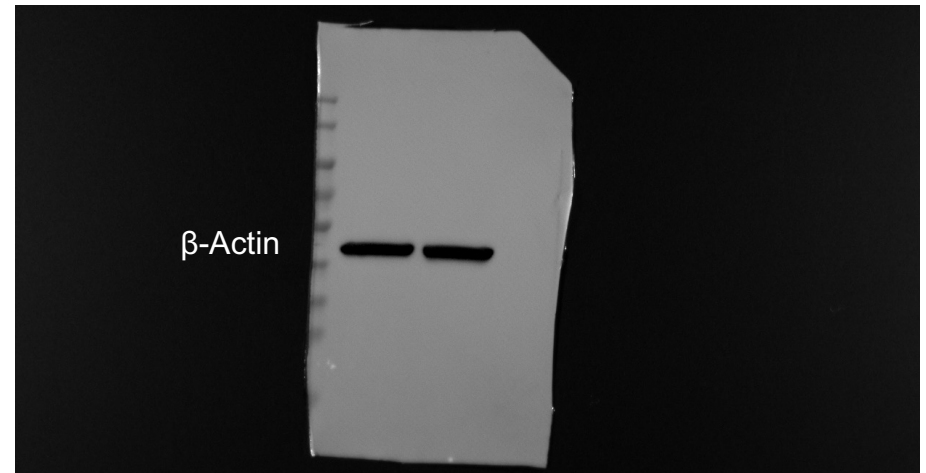

Supplement: fig3-data3 [file elife-101984-fig3-data3-v1.zip]

# CRISPR/CAS9

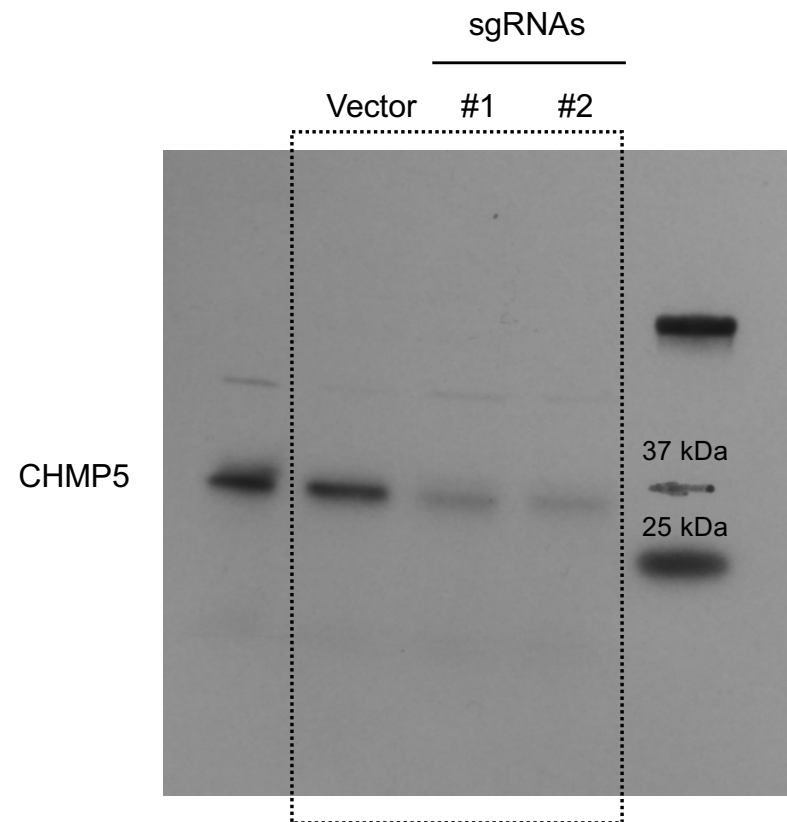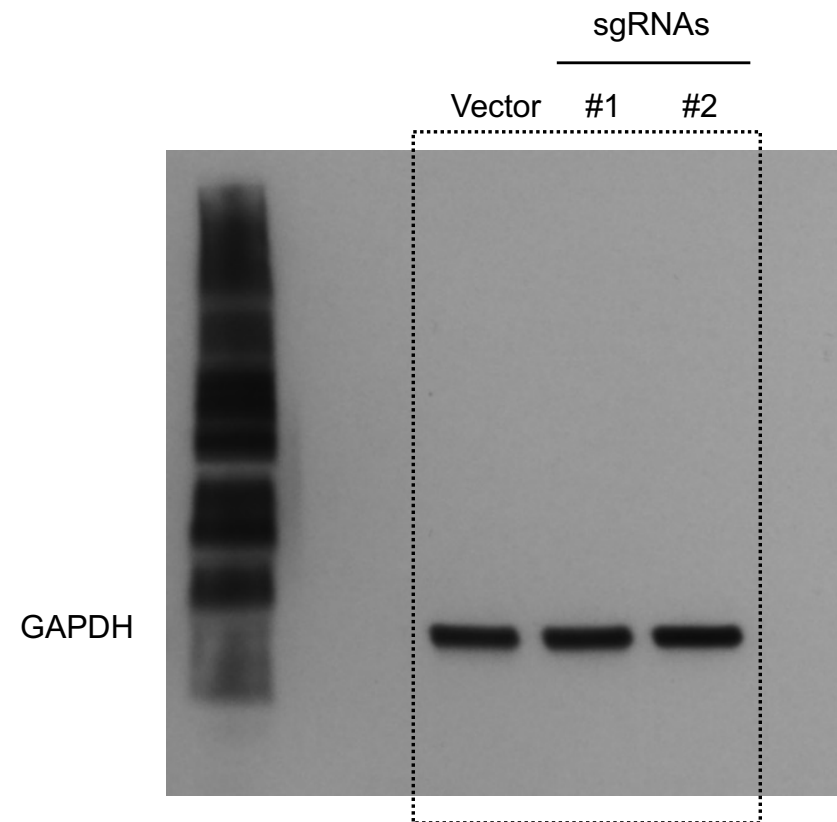

Supplement: fig3-figsupp1-data3 [file elife-101984-fig3-figsupp1-data3-v1.zip]

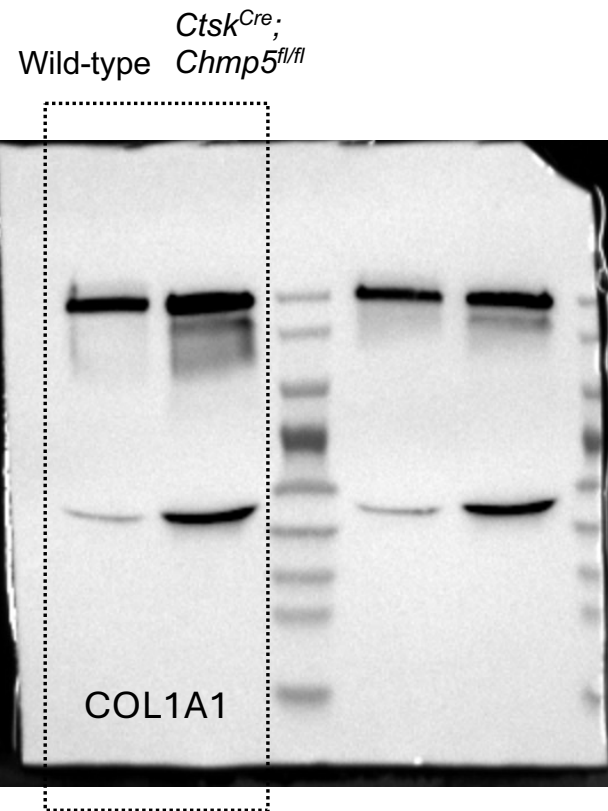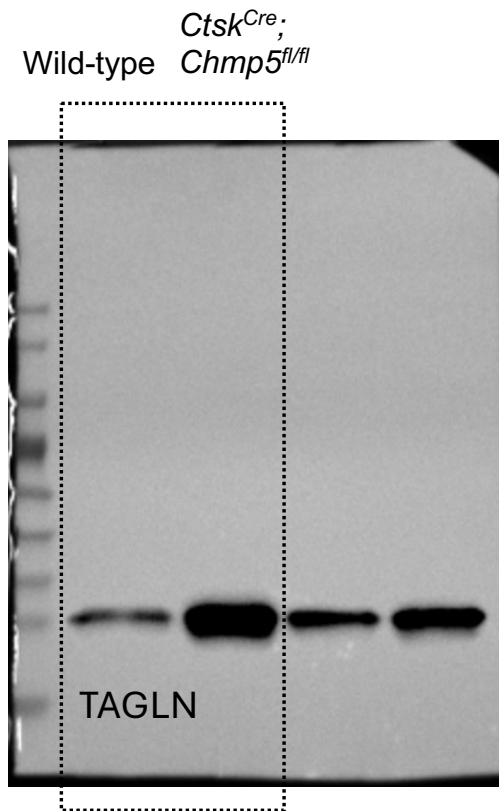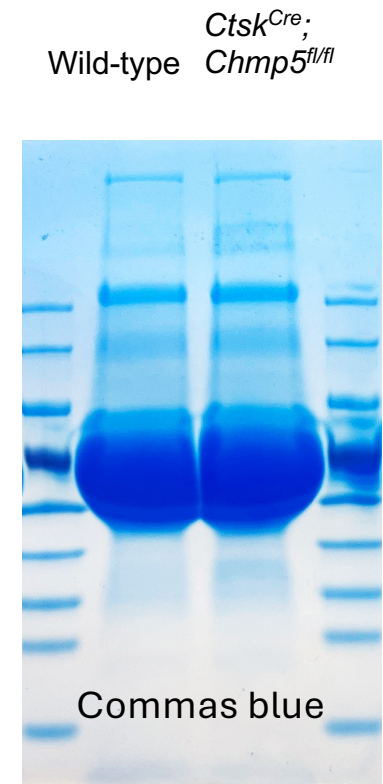

Supplement: fig4-data3 [file elife-101984-fig4-data3-v1.zip]

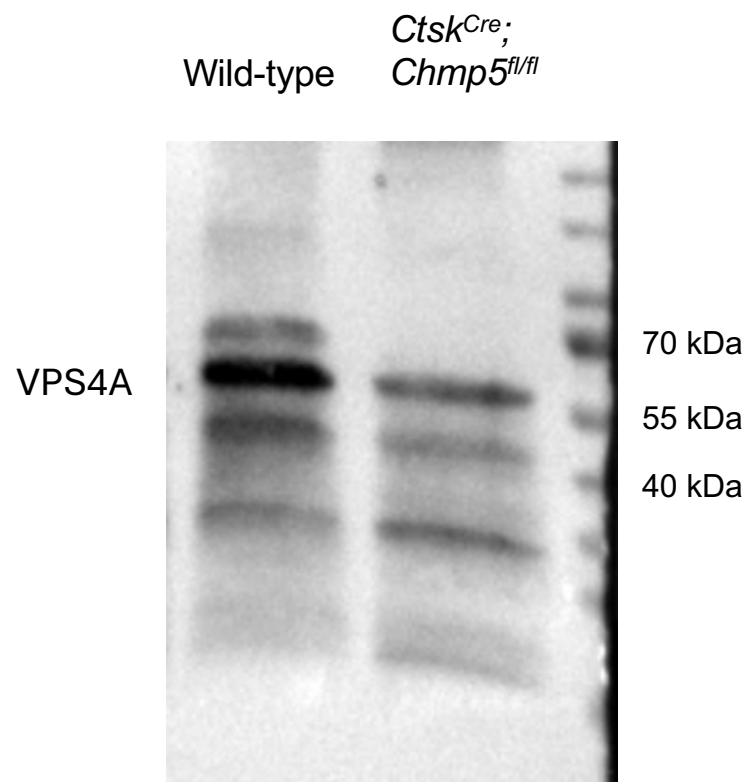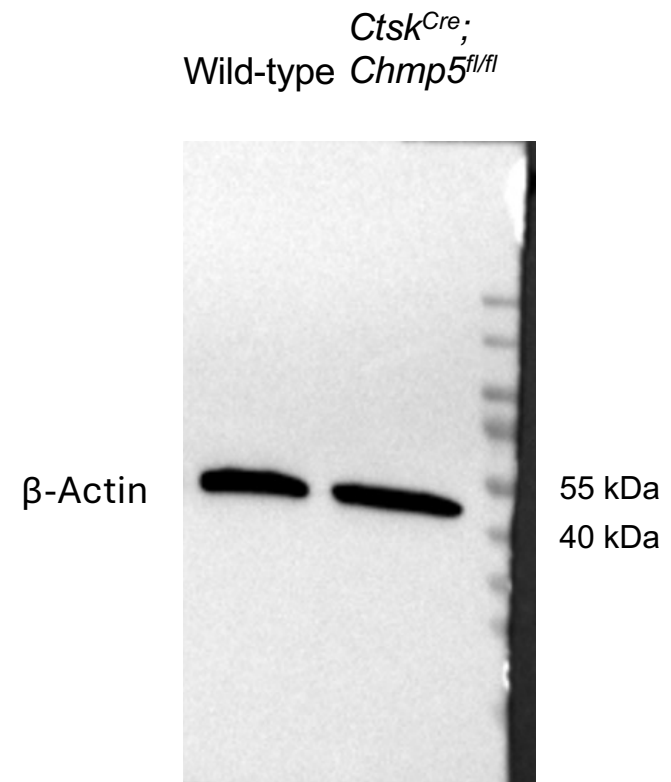

Supplement: fig6-data3 [file elife-101984-fig6-data3-v1.zip]

Vector CHMP5-flag

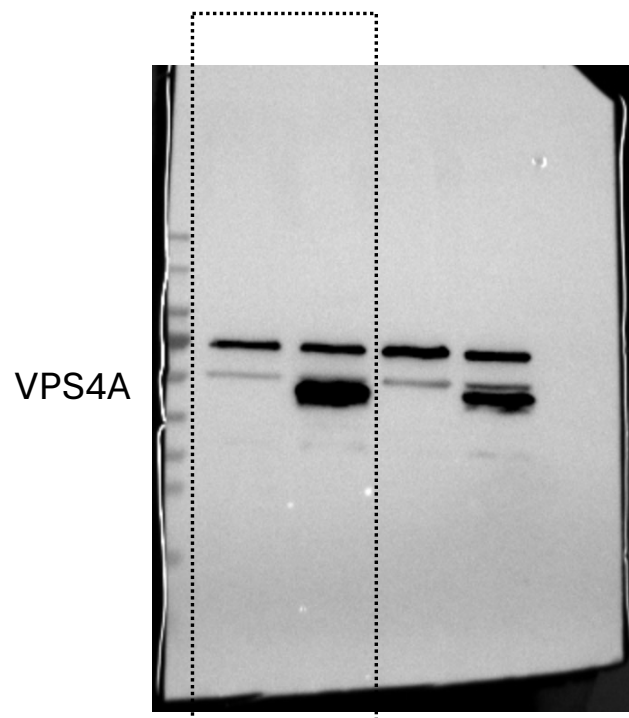

Vector CHMP5-flag

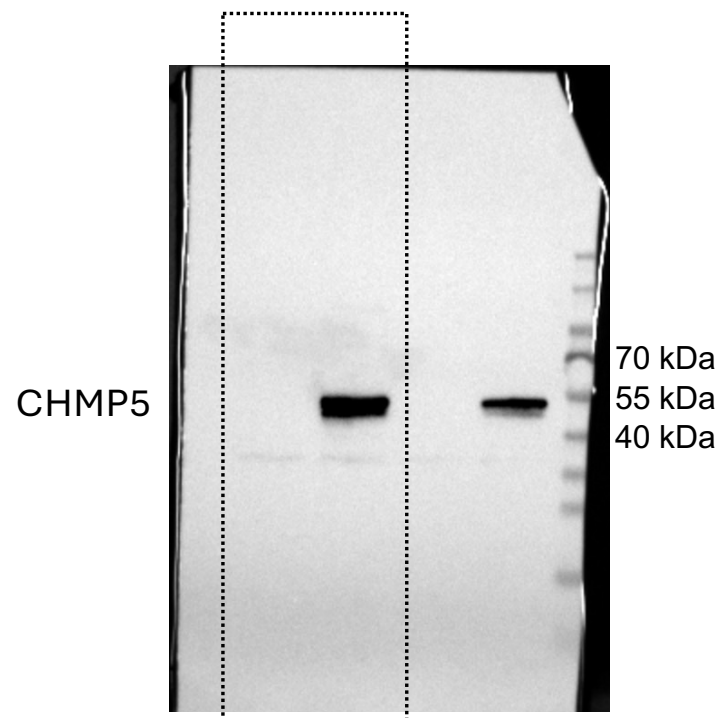

Vector CHMP5-flag

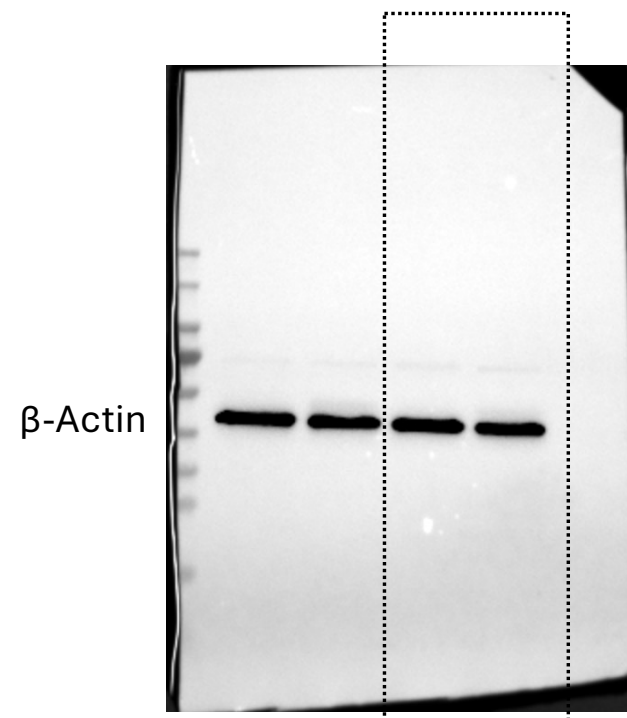

Supplement: fig6-figsupp1-data3 [file elife-101984-fig6-figsupp1-data3-v1.zip]
